# Supplementary material for: Assessing adaptation and mitigation potential of roadside trees under the influence of vehicular emissions: A case study of Grevillea robusta and Mangifera indica planted in an urban city of India
Source: PLoS One. 2020 Jan 28;15(1):e0227380. doi: 10.1371/journal.pone.0227380 (PMC6986729; doi:10.1371/journal.pone.0227380)
Supplement: S1 Data — (XLSX) [file pone.0227380.s001.xlsx]

## Sheet: Sheet1
	Grevillea FRI Grevillea Roadside																	Mangifera FRI																			Mangifera roadside
	Dust removal	Thickness	E	A	Tamb	Tleaf	Temp.Diff	WUE	VpD	PARi	PARe	Dust removal	Leaf thick.	E	A	Tamb	Tleaf	Temp. Diff	WUE	VpD	PARi	PARe	Dust removal	Leaf Thick.	gs	E	A	Tamb	Tleaf	Temp. Diff	WUE	VpD	PARi	PARe	Dust removal	Leaf Thick.	gs	E	A	Tamb	Tleaf	Temp. Diff	WUE	VpD	PARi	PARe
	0.003	0.32	4.25	0.5	36.3	37.1	0.8	0.41	4.18	829	1557	0.001	0.47	3.3	1.2	36.4	36.5	0.1	0.39	5.94	289	192	0.003	0.49	27	2.48	3.6	34.3	34.5	0.2	0.95	4.12	731	1537	0.002	0.63	11	1	2	40	41.2	1.2	1.07	7.67	1345	1999			Thickness
	0.005	0.28	4.5	0.8	36.2	36.3	0.1	0.53	4.61	297	931	0.002	0.45	4.34	1.4	36.8	37.2	0.4	0.04	6.21	890	261	0.002	0.46	34	2.78	3.7	34.2	34.8	0.6	1.22	5.26	462	1227	0.003	0.62	13	1.13	2.2	40.4	40	-0.4	1.39	6.82	1268	1878			Stom. Con.
	0.003	0.27	5.2	1	35.1	35.5	0.4	0.54	5.31	346	1323	0.001	0.42	5.07	1.4	36.9	37.2	0.3	0.16	5.98	375	186	0.002	0.46	39	2.98	3.7	35.3	35.6	0.3	0.62	5.02	416	1118	0.003	0.59	22	1.69	2.3	40.6	42.5	1.9	0.42	7.68	1340	1970			Transp.
	0.003	0.25	5.36	2.2	35.2	35.4	0.2	0.24	3.77	542	1437	0.004	0.42	5.28	1.5	36.9	37	0.2	0.48	5.84	690	768	0.002	0.46	72	3.77	3.9	35.4	34.9	-0.5	1.2	4.88	807	1511	0.004	0.58	34	2.24	2.5	39.5	40.6	1.1	1.1	6.91	1170	1782			Photosyn.
	0.002	0.24	5.5	2.3	37.6	38.3	0.7	0.2	4.53	462	1380	0.01	0.41	5.38	2.3	37.3	37.9	0.6	0.3	6.32	394	446	0.002	0.45	76	4.58	4.2	35.5	35.9	0.4	1.66	5.16	895	1570	0.004	0.57	41	2.87	2.6	40.3	41	0.7	0.42	6.71	396	1609			Tdiff.
	0.002	0.24	5.57	2.4	38	38.1	0.1	0.73	5.59	816	1513	0.007	0.41	5.65	2.3	37.3	38.3	1	0.61	6.66	865	265	0.003	0.45	79	4.98	4.5	35.6	36.2	0.6	1.29	5.59	1040	1673	0.002	0.57	44	3.2	2.7	40.5	41.6	1.1	1.36	7.81	791	1634			WUE
	0.002	0.24	5.8	2.7	36.9	36.4	-0.5	0.23	5.01	526	1003	0.006	0.39	6.13	2.4	37.4	39	1.6	0.81	5.93	758	217	0.002	0.44	87	5.15	4.5	36.1	35.9	-0.2	0.95	4.83	342	402	0.003	0.56	48	3.55	3.3	40.4	41.5	1.1	1.07	7.64	1264	1912			VpD
	0.003	0.23	6.19	2.8	37.6	37.9	0.3	0.5	5.62	300	1254	0.007	0.39	6.27	2.5	37.3	37.6	0.3	0.2	5.93	1067	257	0.002	0.43	97	5.47	4.58	36.5	37.5	1	0.78	5.95	597	1482	0.004	0.55	51	3.95	3.4	39.2	40.5	1.3	0.51	6.87	1374	2010			PARi
	0.003	0.23	6.36	2.9	36.7	37	0.3	0.78	5.38	456	583	0.008	0.37	6.54	3.5	37.2	36.3	-0.9	0.52	5.66	207	196	0.001	0.42	103	5.69	4.6	36.5	37.9	1.4	0.89	5.48	727	1597	0.003	0.55	52	4.12	3.5	39.1	40.2	1.1	1.25	6.98	970	1729			cooling GII
	0.006	0.22	6.64	3.2	35.4	35.8	0.4	0.28	5.47	414	1022	0.01	0.37	7.12	3.5	37.3	39.7	2.4	0.21	5.99	963	220	0.002	0.42	106	5.89	4.8	36.6	36.5	-0.1	0.64	5.05	172	1395	0.002	0.54	60	4.33	3.6	39.1	45.4	6.3	1.24	7.99	1375	2000
	0.002	0.21	7.6	3.4	36.4	36.9	0.5	0.63	5.42	264	305	0.008	0.36	7.18	4.1	37.3	40.5	3.2	0.18	6.83	978	242	0.002	0.4	115	5.92	4.9	36.7	37.6	0.9	0.77	5.62	1126	1954	0.002	0.53	83	5.1	4.9	39.3	39.7	0.4	1.49	7.5	948	1871
	0.003	0.2	9.5	3.9	37.4	37.7	0.3	0.15	5.55	331	1420	0.004	0.35	7.83	5.2	37.3	36.5	-0.8	1.64	6.71	381	176	0.003	0.39	175	6.26	5.8	36.4	37	0.6	0.79	5.27	452	225	0.002	0.52	91	5.38	5.3	39.3	39.1	-0.2	0.78	5.99	932	2010
	0.004	0.19	11.51	4	35.1	35.5	0.4	0.4	5.72	405	550	0.005	0.35	5.81	2.41	37.12	37.81	0.69	0.41	6.15	645	344	0.001	0.38	87	6.56	6.7	36.5	36.5	0	0.73	5.2	297	655	0.004	0.5	45	3.21	6.1	39.71	41.01	1.3	1.24	7.21	1093	1863
	0.002	0.17	6.46	4	37.1	37.3	0.2	0.47	5.92	669	469	0.006	0.34	5.84	2.61	37.12	37.81	0.69	0.47	6.17	647	341	0.002	0.35	84	4.71	4.68	35.72	36.12	0.4	0.83	5.21	621	1256	0.003	0.48	46	3.19	3.4	39.81	41.11	1.3	1.39	7.23	1098	1867
	0.004	0.13	6.46	4.7	37.5	38.6	1.1	0.22	6.06	780	1381	0.007	0.31	5.87	2.81	37.12	37.81	0.69	0.31	6.19	643	296	0.003	0.3	81	4.91	4.48	35.92	36.32	0.4	0.96	5.17	619	1258	0.004	0.43	47	3.23	3.44	39.91	41.21	1.3	1.36	7.19	1103	1871
	0.004	0.275	4.85	0.9	35.65	35.9	0.25	0.535	4.96	321.5	1127	0.0015	0.435	4.705	1.4	36.85	37.2	0.35	0.1	6.095	632.5	223.5	0.002	0.46	36.5	2.88	3.7	34.75	35.2	0.45	0.92	5.14	439	1172.5	0.003	0.605	17.5	1.41	2.25	40.5	41.25	0.75	0.905	7.25	1304	1924
	0.0025	0.205	8.55	3.65	36.9	37.3	0.4	0.39	5.485	297.5	862.5	0.006	0.355	7.505	4.65	37.3	38.5	1.2	0.91	6.77	679.5	209	0.0025	0.395	145	6.09	5.35	36.55	37.3	0.75	0.78	5.445	789	1089.5	0.002	0.525	87	5.24	5.1	39.3	39.4	0.1	1.135	6.745	940	1940.5
	0.004	0.275	4.85	0.9	35.65	35.9	0.25	0.535	4.96	321.5	1127	0.0015	0.435	4.705	1.4	36.85	37.2	0.35	0.1	6.095	632.5	223.5	0.002	0.46	36.5	2.88	3.7	34.75	35.2	0.45	0.92	5.14	439	1172.5	0.003	0.605	17.5	1.41	2.25	40.5	41.25	0.75	0.905	7.25	1304	1924
	0.004	0.3	4.375	0.65	36.25	36.7	0.45	0.47	4.395	563	1244	0.0015	0.46	3.82	1.3	36.6	36.85	0.25	0.215	6.075	589.5	226.5	0.0025	0.475	30.5	2.63	3.65	34.25	34.65	0.4	1.085	4.69	596.5	1382	0.0025	0.625	12	1.065	2.1	40.2	40.6	0.4	1.23	7.245	1306.5	1938.5
	0.003	0.18	8.985	4	36.1	36.4	0.3	0.435	5.82	537	509.5	0.0055	0.345	5.825	2.51	37.12	37.81	0.69	0.44	6.16	646	342.5	0.0015	0.365	85.5	5.635	5.69	36.11	36.31	0.2	0.78	5.205	459	955.5	0.0035	0.49	45.5	3.2	4.75	39.76	41.06	1.3	1.315	7.22	1095.5	1865
	0.0025	0.245	5.43	2.25	36.4	36.85	0.45	0.22	4.15	502	1408.5	0.007	0.415	5.33	1.9	37.1	37.45	0.4	0.39	6.08	542	607	0.002	0.455	74	4.175	4.05	35.45	35.4	-0.05	1.43	5.02	851	1540.5	0.004	0.575	37.5	2.555	2.55	39.9	40.8	0.9	0.76	6.81	783	1695.5
	0.0035	0.195	10.505	3.95	36.25	36.6	0.35	0.275	5.635	368	985	0.0045	0.35	6.82	3.805	37.21	37.155	-0.055	1.025	6.43	513	260	0.002	0.385	131	6.41	6.25	36.45	36.75	0.3	0.76	5.235	374.5	440	0.003	0.51	68	4.295	5.7	39.505	40.055	0.55	1.01	6.6	1012.5	1936.5
	0.0024	0.236	5.884	2.62	37.36	37.54	0.18	0.488	5.226	512	1146.6	0.0076	0.394	5.994	2.6	37.3	37.82	0.52	0.488	6.1	658.2	276.2	0.002	0.438	88.4	5.174	4.476	36.04	36.68	0.64	1.114	5.402	720.2	1344.8	0.0032	0.56	47.2	3.538	3.1	39.9	40.96	1.06	0.922	7.202	959	1778.8
	0.003	0.186667	9.15667	3.96667	36.5333	36.8333	0.3	0.34	5.73	468.333	813	0.005	0.346667	6.49333	3.40667	37.18	37.3733	0.193333	0.84	6.34333	557.667	287	0.002	0.373333	115.333	5.84333	5.72667	36.2067	36.54	0.333333	0.783333	5.22667	456.667	712	0.003	0.5	60.6667	3.92667	4.93333	39.6067	40.4067	0.8	1.13667	6.81	1041	1913.33
	0.00325	0.1725	8.4825	4.15	36.775	37.275	0.5	0.31	5.8125	546.25	955	0.0055	0.3375	6.3375	3.2575	37.165	37.4825	0.3175	0.7075	6.305	579	289.25	0.00225	0.355	106.75	5.61	5.415	36.135	36.485	0.35	0.8275	5.2125	497.25	848.5	0.00325	0.4825	57.25	3.7525	4.56	39.6825	40.6075	0.925	1.1925	6.905	1056.5	1902.75
	0.00233333	0.243333	5.47667	2.3	36.9333	37.2667	0.333333	0.39	4.63	606.667	1443.33	0.007	0.413333	5.43667	2.03333	37.1667	37.7333	0.6	0.463333	6.27333	649.667	493	0.00233333	0.453333	75.6667	4.44333	4.2	35.5	35.6667	0.166667	1.38333	5.21	914	1584.67	0.00333333	0.573333	39.6667	2.77	2.6	40.1	41.0667	0.966667	0.96	7.14333	785.667	1675
	0.00233333	0.243333	5.47667	2.3	36.9333	37.2667	0.333333	0.39	4.63	606.667	1443.33	0.007	0.413333	5.43667	2.03333	37.1667	37.7333	0.6	0.463333	6.27333	649.667	493	0.00233333	0.453333	75.6667	4.44333	4.2	35.5	35.6667	0.166667	1.38333	5.21	914	1584.67	0.00333333	0.573333	39.6667	2.77	2.6	40.1	41.0667	0.966667	0.96	7.14333	785.667	1675
	0.002	0.24	5.62333	2.46667	37.5	37.6	0.1	0.386667	5.04333	601.333	1298.67	0.00766667	0.403333	5.72	2.33333	37.3333	38.4	1.06667	0.573333	6.30333	672.333	309.333	0.00233333	0.446667	80.6667	4.90333	4.4	35.7333	36	0.266667	1.3	5.19333	759	1215	0.003	0.566667	44.3333	3.20667	2.86667	40.4	41.3667	0.966667	0.95	7.38667	817	1718.33
	0.004	0.215	7.12	3.3	35.9	36.35	0.45	0.455	5.445	339	663.5	0.009	0.365	7.15	3.8	37.3	40.1	2.8	0.195	6.41	970.5	231	0.002	0.41	110.5	5.905	4.85	36.65	37.05	0.4	0.705	5.335	649	1674.5	0.002	0.535	71.5	4.715	4.25	39.2	42.55	3.35	1.365	7.745	1161.5	1935.5
	0.007	0.45	10.71	5.2	73.8	75.7	1.9	0.63	10.24	1609	2938	0.008	0.78	9.17	4.01	73.52	74.31	0.79	0.7	12.13	932	488	0.006	0.79	108	7.39	8.08	70.22	70.82	0.6	1.91	9.29	1350	2795	0.006	1.06	58	4.23	5.44	79.91	82.41	2.5	2.43	14.86	2448	3870
	0.007	0.39	21.01	7.9	72.5	73.2	0.7	0.55	11.27	736	1970	0.009	0.7	13.64	7.61	74.42	74.31	-0.11	2.05	12.86	1026	520	0.004	0.77	262	12.82	12.5	72.9	73.5	0.6	1.52	10.47	749	880	0.006	1.02	136	8.59	11.4	79.01	80.11	1.1	2.02	13.2	2025	3873
	0.004	0.275	4.85	0.9	35.65	35.9	0.25	0.535	4.96	321.5	1127	0.0015	0.435	4.705	1.4	36.85	37.2	0.35	0.1	6.095	632.5	223.5	0.002	0.46	36.5	2.88	3.7	34.75	35.2	0.45	0.92	5.14	439	1172.5	0.003	0.605	17.5	1.41	2.25	40.5	41.25	0.75	0.905	7.25	1304	1924
	0.00266667	0.253333	5.35333	1.83333	35.9667	36.4	0.433333	0.326667	4.53667	450	1380	0.005	0.416667	5.24333	1.73333	37.0333	37.3667	0.366667	0.313333	6.04667	486.333	466.667	0.002	0.456667	62.3333	3.77667	3.93333	35.4	35.4667	0.0666667	1.16	5.02	706	1399.67	0.00366667	0.58	32.3333	2.26667	2.46667	40.1333	41.3667	1.23333	0.646667	7.1	968.667	1787
	0.00366667	0.22	6.86667	3.16667	36.1667	36.5667	0.4	0.563333	5.42333	378	636.667	0.00866667	0.366667	6.94667	3.7	37.2667	38.8333	1.56667	0.303333	6.16	716	219.333	0.00166667	0.413333	108	5.83333	4.76667	36.6	37.3333	0.733333	0.766667	5.38333	675	1648.67	0.00233333	0.54	65	4.51667	4	39.1667	41.7667	2.6	1.32667	7.49	1097.67	1866.67
	0.00366667	0.22	6.86667	3.16667	36.1667	36.5667	0.4	0.563333	5.42333	378	636.667	0.00866667	0.366667	6.94667	3.7	37.2667	38.8333	1.56667	0.303333	6.16	716	219.333	0.00166667	0.413333	108	5.83333	4.76667	36.6	37.3333	0.733333	0.766667	5.38333	675	1648.67	0.00233333	0.54	65	4.51667	4	39.1667	41.7667	2.6	1.32667	7.49	1097.67	1866.67
	0.00366667	0.22	6.86667	3.16667	36.1667	36.5667	0.4	0.563333	5.42333	378	636.667	0.00866667	0.366667	6.94667	3.7	37.2667	38.8333	1.56667	0.303333	6.16	716	219.333	0.00166667	0.413333	108	5.83333	4.76667	36.6	37.3333	0.733333	0.766667	5.38333	675	1648.67	0.00233333	0.54	65	4.51667	4	39.1667	41.7667	2.6	1.32667	7.49	1097.67	1866.67
	0.00366667	0.21	7.91333	3.5	36.4	36.8	0.4	0.353333	5.48	336.333	915.667	0.00733333	0.36	7.37667	4.26667	37.3	38.9	1.6	0.676667	6.51	774	212.667	0.00233333	0.403333	132	6.02333	5.16667	36.5667	37.0333	0.466667	0.733333	5.31333	583.333	1191.33	0.002	0.53	78	4.93667	4.6	39.2333	41.4	2.16667	1.17	7.16	1085	1960.33
	0.003375	0.1975	7.59	3.6125	36.65	37.0875	0.4375	0.42875	5.6425	452.375	873	0.006875	0.355	6.5575	3.32875	37.22	38.0038	0.78375	0.4925	6.20375	691.375	259	0.002	0.38625	106	5.67625	5.0675	36.355	36.93	0.575	0.79875	5.36875	576.375	1227.75	0.003	0.5125	59.375	4.06375	4.205	39.4287	41.0287	1.6	1.1575	7.12	1111.62	1902.62
	0.00366667	0.29	4.65	0.766667	35.8667	36.3	0.433333	0.493333	4.7	490.667	1270.33	0.00133333	0.446667	4.23667	1.33333	36.7	36.9667	0.266667	0.196667	6.04333	518	213	0.00233333	0.47	33.3333	2.74667	3.66667	34.6	34.9667	0.366667	0.93	4.8	536.333	1294	0.00266667	0.613333	15.3333	1.27333	2.16667	40.3333	41.2333	0.9	0.96	7.39	1317.67	1949
	0.0025	0.235	5.98	2.7	37.3	37.35	0.05	0.56	5.4	524.5	1088.25	0.007	0.39	6.1475	2.675	37.3	37.8	0.5	0.535	6.045	724.25	233.75	0.002	0.435	91.5	5.3225	4.545	36.175	36.875	0.7	0.9775	5.4625	676.5	1288.5	0.003	0.5575	48.75	3.705	3.225	39.8	40.95	1.15	1.0475	7.325	1099.75	1821.25
	0.00266667	0.233333	6.11667	2.8	37.0667	37.1	0.0333333	0.503333	5.33667	427.333	946.667	0.007	0.383333	6.31333	2.8	37.3	37.6333	0.333333	0.51	5.84	677.333	223.333	0.00166667	0.43	95.6667	5.43667	4.56	36.3667	37.1	0.733333	0.873333	5.42	555.333	1160.33	0.00333333	0.553333	50.3333	3.87333	3.4	39.5667	40.7333	1.16667	0.943333	7.16333	1202.67	1883.67
	0.004	0.226667	6.39667	2.96667	36.5667	36.9	0.333333	0.52	5.49	390	953	0.00833333	0.376667	6.64333	3.16667	37.2667	37.8667	0.6	0.31	5.86	745.667	224.333	0.00166667	0.423333	102	5.68333	4.66	36.5333	37.3	0.766667	0.77	5.49333	498.667	1491.33	0.003	0.546667	54.3333	4.13333	3.5	39.1333	42.0333	2.9	1	7.28	1239.67	1913
	0.0035	0.186667	8.02833	3.86667	36.4833	36.9667	0.483333	0.358333	5.69	477.167	857.833	0.00666667	0.346667	6.60833	3.43833	37.21	38.355	1.145	0.536667	6.34	709.5	269.833	0.00216667	0.373333	108	5.70833	5.22667	36.3067	36.6733	0.366667	0.786667	5.25333	547.833	1123.83	0.00283333	0.5	62	4.07333	4.45667	39.5217	41.255	1.73333	1.25	7.185	1091.5	1913.67
	0.004	0.215	7.12	3.3	35.9	36.35	0.45	0.455	5.445	339	663.5	0.009	0.365	7.15	3.8	37.3	40.1	2.8	0.195	6.41	970.5	231	0.002	0.41	110.5	5.905	4.85	36.65	37.05	0.4	0.705	5.335	649	1674.5	0.002	0.535	71.5	4.715	4.25	39.2	42.55	3.35	1.365	7.745	1161.5	1935.5
	0.003	0.186667	9.15667	3.96667	36.5333	36.8333	0.3	0.34	5.73	468.333	813	0.005	0.346667	6.49333	3.40667	37.18	37.3733	0.193333	0.84	6.34333	557.667	287	0.002	0.373333	115.333	5.84333	5.72667	36.2067	36.54	0.333333	0.783333	5.22667	456.667	712	0.003	0.5	60.6667	3.92667	4.93333	39.6067	40.4067	0.8	1.13667	6.81	1041	1913.33
	0.004	0.275	4.85	0.9	35.65	35.9	0.25	0.535	4.96	321.5	1127	0.0015	0.435	4.705	1.4	36.85	37.2	0.35	0.1	6.095	632.5	223.5	0.002	0.46	36.5	2.88	3.7	34.75	35.2	0.45	0.92	5.14	439	1172.5	0.003	0.605	17.5	1.41	2.25	40.5	41.25	0.75	0.905	7.25	1304	1924
	0.0025	0.235	5.995	2.75	37.25	37.15	-0.1	0.365	5.315	413	1128.5	0.0065	0.39	6.2	2.45	37.35	38.3	0.95	0.505	5.93	912.5	237	0.002	0.435	92	5.31	4.54	36.3	36.7	0.4	0.865	5.39	469.5	942	0.0035	0.555	49.5	3.75	3.35	39.8	41	1.2	0.79	7.255	1319	1961
	0.004	0.226667	6.39667	2.96667	36.5667	36.9	0.333333	0.52	5.49	390	953	0.00833333	0.376667	6.64333	3.16667	37.2667	37.8667	0.6	0.31	5.86	745.667	224.333	0.00166667	0.423333	102	5.68333	4.66	36.5333	37.3	0.766667	0.77	5.49333	498.667	1491.33	0.003	0.546667	54.3333	4.13333	3.5	39.1333	42.0333	2.9	1	7.28	1239.67	1913
	0.00266667	0.233333	6.11667	2.8	37.0667	37.1	0.0333333	0.503333	5.33667	427.333	946.667	0.007	0.383333	6.31333	2.8	37.3	37.6333	0.333333	0.51	5.84	677.333	223.333	0.00166667	0.43	95.6667	5.43667	4.56	36.3667	37.1	0.733333	0.873333	5.42	555.333	1160.33	0.00333333	0.553333	50.3333	3.87333	3.4	39.5667	40.7333	1.16667	0.943333	7.16333	1202.67	1883.67
	0.003	0.15	6.46	4.35	37.3	37.95	0.65	0.345	5.99	724.5	925	0.0065	0.325	5.855	2.71	37.12	37.81	0.69	0.39	6.18	645	318.5	0.0025	0.325	82.5	4.81	4.58	35.82	36.22	0.4	0.895	5.19	620	1257	0.0035	0.455	46.5	3.21	3.42	39.86	41.16	1.3	1.375	7.21	1100.5	1869
	0.0025	0.205	8.55	3.65	36.9	37.3	0.4	0.39	5.485	297.5	862.5	0.006	0.355	7.505	4.65	37.3	38.5	1.2	0.91	6.77	679.5	209	0.0025	0.395	145	6.09	5.35	36.55	37.3	0.75	0.78	5.445	789	1089.5	0.002	0.525	87	5.24	5.1	39.3	39.4	0.1	1.135	6.745	940	1940.5
	0.0045	0.225	6.5	3.05	36.05	36.4	0.35	0.53	5.425	435	802.5	0.009	0.37	6.83	3.5	37.25	38	0.75	0.365	5.825	585	208	0.0015	0.42	104.5	5.79	4.7	36.55	37.2	0.65	0.765	5.265	449.5	1496	0.0025	0.545	56	4.225	3.55	39.1	42.8	3.7	1.245	7.485	1172.5	1864.5
	0.002	0.24	5.62333	2.46667	37.5	37.6	0.1	0.386667	5.04333	601.333	1298.67	0.00766667	0.403333	5.72	2.33333	37.3333	38.4	1.06667	0.573333	6.30333	672.333	309.333	0.00233333	0.446667	80.6667	4.90333	4.4	35.7333	36	0.266667	1.3	5.19333	759	1215	0.003	0.566667	44.3333	3.20667	2.86667	40.4	41.3667	0.966667	0.95	7.38667	817	1718.33
	0.0035	0.195	10.505	3.95	36.25	36.6	0.35	0.275	5.635	368	985	0.0045	0.35	6.82	3.805	37.21	37.155	-0.055	1.025	6.43	513	260	0.002	0.385	131	6.41	6.25	36.45	36.75	0.3	0.76	5.235	374.5	440	0.003	0.51	68	4.295	5.7	39.505	40.055	0.55	1.01	6.6	1012.5	1936.5
	0.00375	0.205	8.8125	3.625	36.075	36.475	0.4	0.365	5.54	353.5	824.25	0.00675	0.3575	6.985	3.8025	37.255	38.6275	1.3725	0.61	6.42	741.75	245.5	0.002	0.3975	120.75	6.1575	5.55	36.55	36.9	0.35	0.7325	5.285	511.75	1057.25	0.0025	0.5225	69.75	4.505	4.975	39.3525	41.3025	1.95	1.1875	7.1725	1087	1936
	0.003	0.2	9.53667	3.76667	36.3	36.7	0.4	0.393333	5.56333	333.333	758.333	0.00566667	0.353333	6.94	3.90333	37.24	38.27	1.03	0.743333	6.56333	668	254	0.002	0.39	125.667	6.24667	5.8	36.5333	37.0333	0.5	0.763333	5.36333	625	944.667	0.00266667	0.516667	73	4.56333	5.43333	39.4367	39.9367	0.5	1.17	6.9	991	1914.67
	0.003125	0.21125	7.5075	3.3625	36.575	36.8125	0.2375	0.43	5.51125	420.625	825.75	0.00675	0.365	6.59	3.2775	37.255	38.1525	0.8975	0.555	6.17125	705.75	249.125	0.001875	0.40375	106.75	5.70625	5.07	36.3775	36.8775	0.5	0.7975	5.32625	541.75	1120.75	0.002875	0.52875	59.5	4.10375	4.1875	39.49	41.065	1.575	1.12125	7.17625	1131.75	1907.75
	0.003	0.186667	9.15667	3.96667	36.5333	36.8333	0.3	0.34	5.73	468.333	813	0.005	0.346667	6.49333	3.40667	37.18	37.3733	0.193333	0.84	6.34333	557.667	287	0.002	0.373333	115.333	5.84333	5.72667	36.2067	36.54	0.333333	0.783333	5.22667	456.667	712	0.003	0.5	60.6667	3.92667	4.93333	39.6067	40.4067	0.8	1.13667	6.81	1041	1913.33
	0.00375	0.205	8.8125	3.625	36.075	36.475	0.4	0.365	5.54	353.5	824.25	0.00675	0.3575	6.985	3.8025	37.255	38.6275	1.3725	0.61	6.42	741.75	245.5	0.002	0.3975	120.75	6.1575	5.55	36.55	36.9	0.35	0.7325	5.285	511.75	1057.25	0.0025	0.5225	69.75	4.505	4.975	39.3525	41.3025	1.95	1.1875	7.1725	1087	1936
[truncated: 2 more columns]
